# Supplementary material for: A smart roof that transforms raindrops into agricultural spraying
Source: Royal Society of Chemistry journal article supplement (doi:10.1039/d4cc03251a), 2024-01-01
Supplement: d4cc03251a1.pdf [file d4cc03251a1.pdf]

## Electronic Supporting Information

# A smart roof transforming raindrops into agricultural spraying

Tao Shen,<sup>a,b</sup> Can Gao,<sup>b,c</sup> Xile Deng,<sup>\*d</sup> Shijie Liu,<sup>b</sup> Zhuoxing Liu,<sup>b,c</sup> Jia Peng,<sup>b,c</sup> Jie Ma,<sup>b,c</sup> Lianyang Bai,<sup>d</sup> Lei Jiang,<sup>a,b</sup> and Zhichao Dong<sup>\*b,c</sup>

### Affiliations

<sup>a</sup> *Research Institute for Frontier Science, Key Laboratory of Bio-Inspired Smart Interfacial Science and Technology of Ministry of Education Beijing, School of Chemistry, Beihang University, Beijing 100191, People's Republic of China.*

<sup>b</sup> *CAS Key Laboratory of Bio-inspired Materials and Interfacial Science, Technical Institute of Physics and Chemistry, Chinese Academy of Sciences, Beijing 100190, People's Republic of China.*

<sup>c</sup> *School of Future Technology & School of Nanoscience and Engineering, University of Chinese Academy of Sciences, Beijing 101407, People's Republic of China.*

<sup>d</sup> *Key Laboratory for Biology and Control of Weeds, Hunan Academy of Agricultural Sciences, Changsha, Hunan 410125, People's Republic of China.*

### Corresponding author:

\*Email address: [dengxile@hunaas.cn](mailto:dengxile@hunaas.cn), [dongzhichao@mail.ipc.ac.cn](mailto:dongzhichao@mail.ipc.ac.cn)

### This PDF file includes:

Figs. S1 to S3

Legend for Movie S1

### Other supplementary materials for this manuscript include the following:

Movie S1

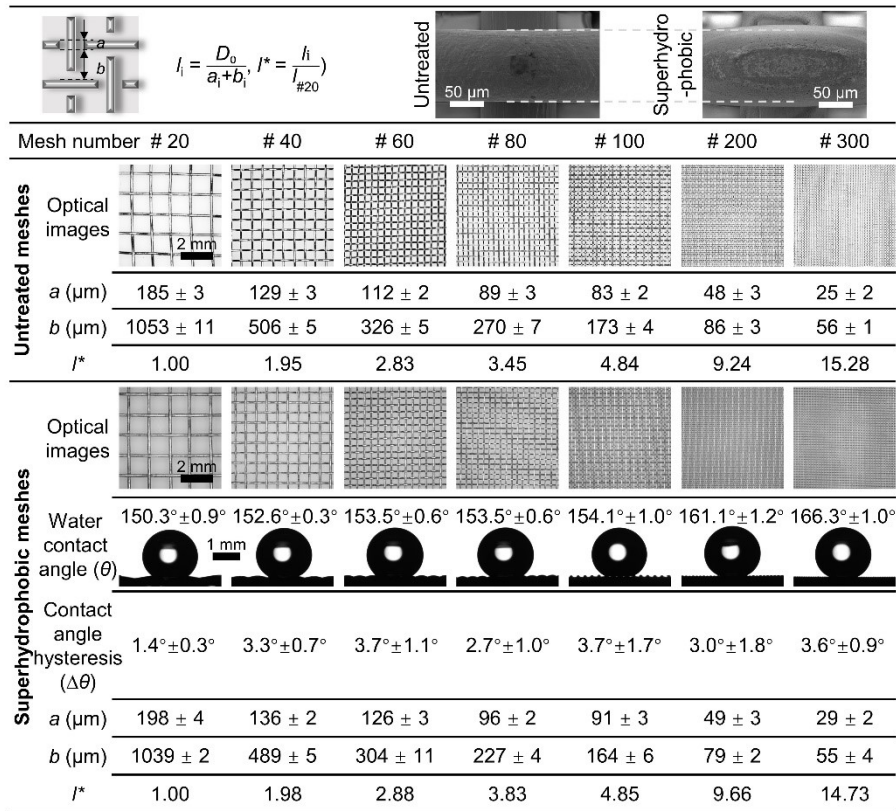

**Fig. S1 Measurement and calculation of superhydrophobic mesh parameters.** SEM images of untreated and superhydrophobic #100 mesh. Optical microscopic images showing the mesh of different pore sizes. The width of the single wire ( $a$ ) and the free area ( $b$ ) of different meshes are measured. The water contact angles ( $\theta$ ) are characterized by a contact angle device (DSA 25S, KRUSS, Germany) with liquid droplets of 2  $\mu\text{L}$ . Contact angle hysteresis ( $\Delta\theta$ ) were measured using the DSA 25S with liquid droplets from 3  $\mu\text{L}$  to 10  $\mu\text{L}$ .  $I_i = D_0 / (a_i + b_i)$ , where  $D_0$  is the initial diameter of droplet,  $a_i$  and  $b_i$  is the width of single wire and free area, respectively, and subscript  $i$  refers to different mesh number.  $I^*$  is defined as the scaling factor representing the mesh density ( $I^* = I_i / I_{\#20}$ ). Data are shown as mean  $\pm$  SD (N = 5, independent experiments), and the error bar represents SD. The mesh density scaling factor ( $I^*$ ) is proposed to normalize the mesh size, and calculated by measured results.

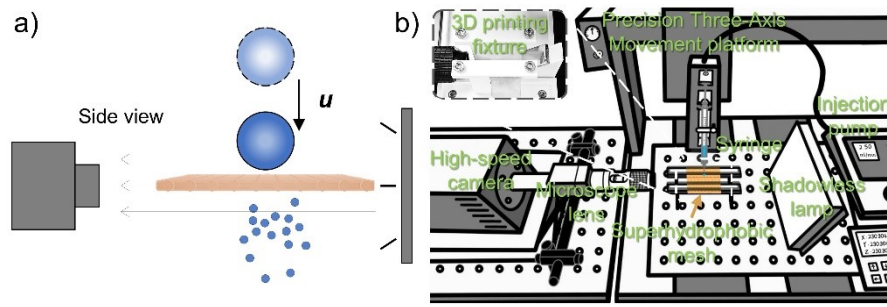

**Fig. S2 Experimental setup for photographing droplets impact-fragmentation.** a) Schematic diagram of high-speed photography in side view. b) Sketch of a set of 3D printed apparatus for firmly fixing superhydrophobic meshes and precisely regulating impact velocity of droplets.

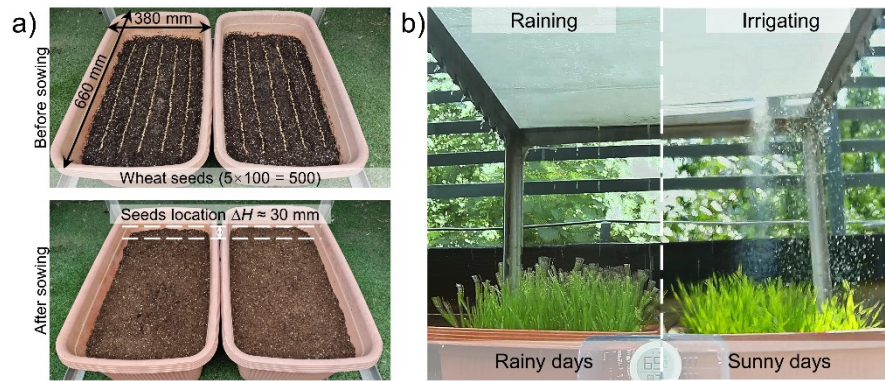

**Fig. S3 Outdoor wheat seedling growth experiments.** a) Wheat seeds pattern before covered by a soil layer with thickness  $\Delta H$  of 30 mm. The inner size of the planting box is  $660 \times 380 \times 230$  mm, length  $\times$  width  $\times$  depth. The seeds are evenly spread in 5 rows of 100 seeds spaced with 60mm. b) Chronophotography of microdroplets fragmented by raindrops in rainy days and irrigated waterdrops in sunny days impacting superhydrophobic mesh, respectively.

**Mov. S1 (separate file)** Outdoor wheat seedling growth under the microdroplet spraying achieved by water impacting the superhydrophobic mesh. Microdroplets spraying can be achieved by the fragmentation of raindrops in rainy days (left) or irrigated waterdrops in sunny days (right) after impacting superhydrophobic mesh.
